# Supplementary material for: Evolution of the Microstructure and Phase Composition of the Products Formed in the Reaction between Iridium and W2B
Source: MDPI journal article supplement (doi:10.3390/ma15217522), 2022-10-26
Supplement: s1 [file s1]

## SUPPLEMENT

### Evolution of the microstructure and phase composition of the products formed in the reaction between iridium and W<sub>2</sub>B

D.A. Bannykh<sup>1)</sup>, V.V. Lozanov<sup>1)</sup>, T.A. Gavrilova<sup>2)</sup>, A.I. Beskrovny<sup>3)</sup>, N.I. Baklanova<sup>1)</sup>

<sup>1)</sup> *Institute of Solid State Chemistry and Mechanochemistry SB RAS, 18 Kutateladze Str.,  
Novosibirsk 630090, Russia*

<sup>2)</sup> *Rzhanov Institute of Semiconductor Physics SB RAS, 13 Lavrentiev Ave., Novosibirsk 630090,  
Russia*

<sup>3)</sup> *Joint Institute for Nuclear Research, 6 Joliot-Curie Str., Dubna 141980, Russia*

#### 1. Experimental

The XRD measurements were calibrated using Al<sub>2</sub>O<sub>3</sub> as a standard (NIST 1976a). Quantitative phase analysis and lattice parameter refinement were performed using the Rietveld method (Topas 4.2 software, Bruker AXS, Germany). The phases analyzed were cross-referenced against the Inorganic Crystal Structure Database ICSD (FIZ Karlsruhe, Germany, 1996). The crystal structure data for WB, WIr, WIr<sub>3</sub> and W<sub>x</sub>Ir<sub>1-x</sub> solid solution were referenced after Springer Materials database.

The neutron flux was  $5 \cdot 10^6 \text{ nu/cm}^2 \cdot \text{s}$ , and the neutron flight path length was 24.45 m [1]. Because of the large cross sections of absorption for boron and iridium ( $\sigma_{\text{abs}}(\text{B}) = 767 \text{ barn}$ ,  $\sigma_{\text{abs}}(\text{Ir}) = 425 \text{ barn}$ ), the spectrum was accumulated for 12 h. Spectra were measured at  $\theta = 85.8^\circ$  (neutron backscattering). The resolution was  $\Delta d/d \approx 1\%$ ; the range of neutron wavelengths was  $\sim 1\text{--}12 \text{ \AA}$  with the maximum intensity at  $\sim 1.9 \text{ \AA}$ . The TOF-ND patterns were fitted using the GSAS-II software[2].

The morphology and elemental composition were studied using a Hitachi TM 1000 scanning electron microscope coupled with a SwiftED<sup>TM</sup> energy dispersive X-ray spectroscopy (EDS) detector (Oxford Instruments Analytical Ltd., UK, accelerating voltage of 15 kV).

Additionally, the SEM/EDS studies were performed with a Mira 3 LMU high-resolution scanning electron microscope (TESCAN) equipped with an INCA Energy 450 XMax 80 EDS detector with accelerating voltage of 20 kV. Cross-sections of the samples were prepared for in-depth analysis of the microstructure and local elemental composition of the powdered products. The samples were embedded into epoxy resin, cut with a diamond saw, and carefully polished using a set of polycrystalline diamond suspensions with particle size ranging from 9 to 1  $\mu\text{m}$  (Monosyn Duo, Synercon, Germany). The probe current and the energy shift of the recorded spectrum were calibrated using metallic cobalt as a standard. A SU8220 scanning electron microscope (Hitachi, Japan) equipped with QUAD and Quantax 60 EDS detectors (Bruker, USA) was used for detecting boron (K-line) together with tungsten (M-series) and iridium (M-series) at an accelerating voltage of 6 kV (shared-use facilities of the “Nanostructures” Center, Institute of Semiconductor Physics, SB RAS, Novosibirsk) [3,4]. Low accelerating voltage provides a sufficient peak to ground ratio for quantification of boron [3]. In accordance with Bruker recommendation,  $\text{Ni}_3\text{B}$  was used as a calibration standard. SEM images were processed using the ImageJ software (National Institute of Health) to evaluate the sizes of product particles and aggregates.

## **2. RESULTS**

### **2.1. The 1 : 1 mixtures**

#### Scanning electron microscopy

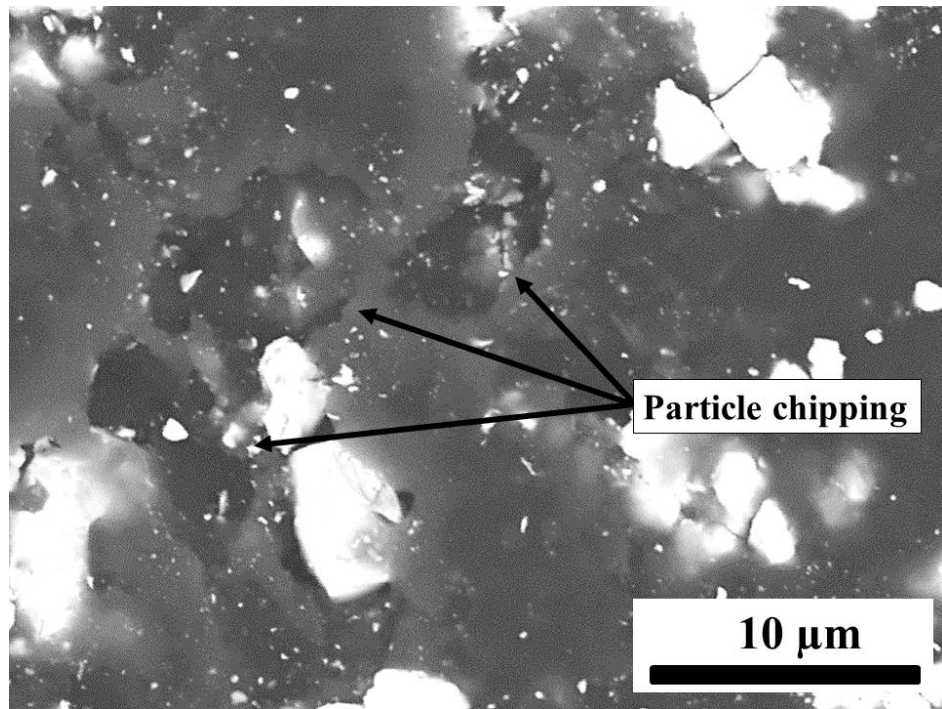

Figure S1. SEM image of the sample heat-treated at 1300°C after preparation of cross-section

## 2.2. The 3 : 1 mixtures

### *Phase composition*

### X-Ray diffraction analysis

Table S1. The unidentified  $d$  spacing and the corresponding  $2\Theta$

|           |       |       |       |       |       |       |       |       |       |
|-----------|-------|-------|-------|-------|-------|-------|-------|-------|-------|
| $2\Theta$ | 23.11 | 26.67 | 30.64 | 31.77 | 35.78 | 44.47 | 49.27 | 50.48 | 51.18 |
| D, Å      | 3.84  | 3.34  | 2.91  | 2.81  | 2.50  | 2.03  | 1.84  | 1.80  | 1.78  |

### The TOF-ND analysis

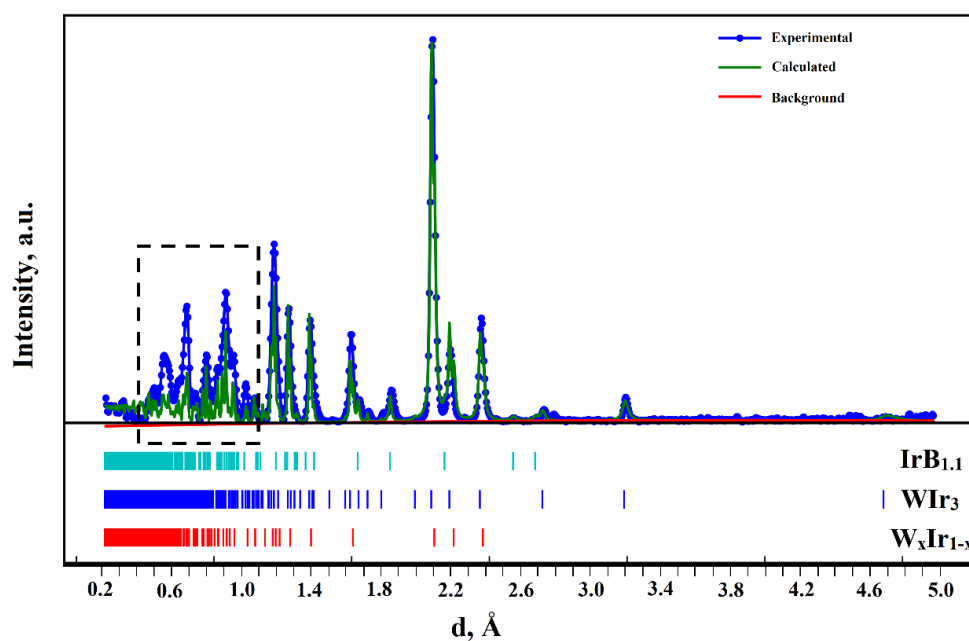

Figure S2. The TOF-ND of the products obtained in the 3 : 1 mixture at 1600°C. The  $d$  range in which the unidentified peaks were detected is denoted by dashed line.

### *Elemental composition*

The BSE SEM/EDS results, accelerating voltage of 6 kV

Spectrum: WIr 8

| Element  | Series   | unn. C<br>[wt.%] | norm. C<br>[wt.%] | Atom. C<br>[at.%] | Error (3 Sigma)<br>[wt.%] |
|----------|----------|------------------|-------------------|-------------------|---------------------------|
| Boron    | K-series | 0.00             | 0.00              | 0.00              | 0.00                      |
| Tungsten | M-series | 25.23            | 30.41             | 31.36             | 3.36                      |
| Iridium  | M-series | 57.74            | 69.59             | 68.64             | 7.39                      |
| Total:   |          | 82.96            | 100.00            | 100.00            |                           |

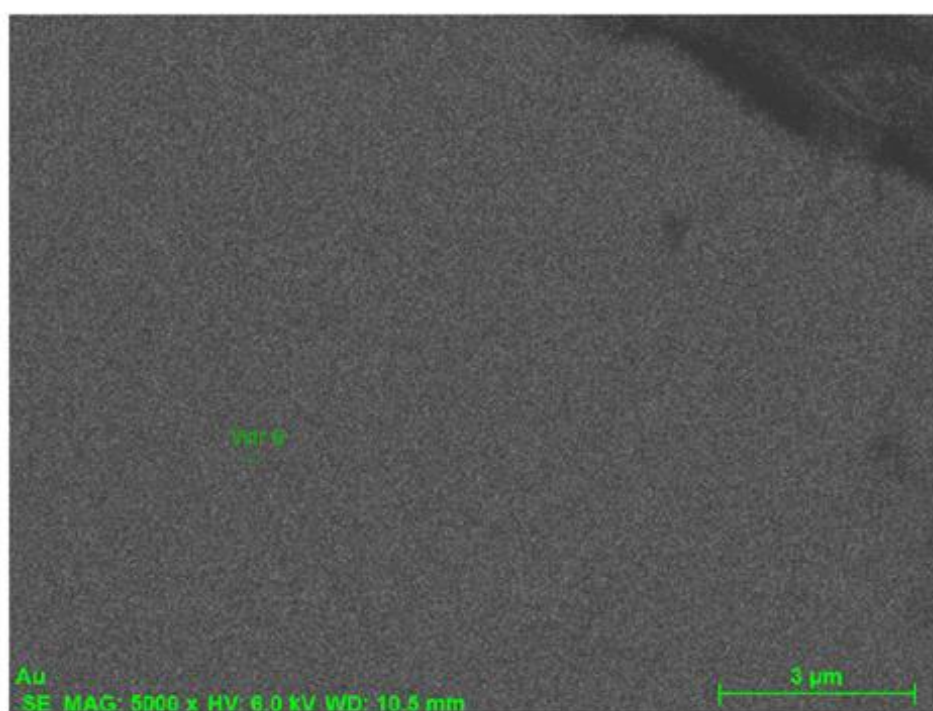

Figure S3. The BSE SEM/EDS image and elemental composition of the area belonging to the  $W_xIr_{1-x}$  intermetallic phase (where  $x \approx 0.33$ )

Spectrum: WIr 1

| Element  | Series   | unn. C<br>[wt.%] | norm. C<br>[wt.%] | Atom. C<br>[at.%] | Error (3 Sigma)<br>[wt.%] |
|----------|----------|------------------|-------------------|-------------------|---------------------------|
| Boron    | K-series | 0.00             | 0.00              | 0.00              | 0.00                      |
| Tungsten | M-series | 22.96            | 31.02             | 31.98             | 3.07                      |
| Iridium  | M-series | 51.05            | 68.98             | 68.02             | 6.56                      |
| Total:   |          | 74.01            | 100.00            | 100.00            |                           |

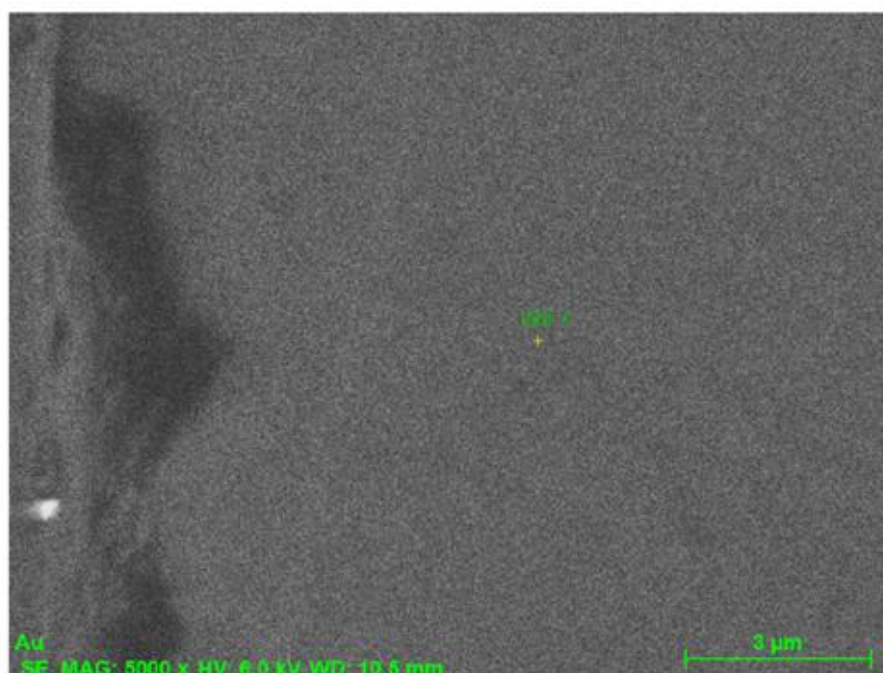

Figure S4. The BSE SEM/EDS image and elemental composition of the area belonging to the  $W_xIr_{1-x}$  intermetallic phase (where  $x \approx 0.33$ )

#### References:

- [1] A.M. Balagurov, A.I. Beskrovnyy, V.V. Zhuravlev, G.M. Mironova, I.A. Bobrikov, D. Neov, S.G. Sheverev, Neutron diffractometer for real-time studies of transient processes at the IBR-2 pulsed reactor, J. Synch. Investig. 10 (2016) 467–479. <https://doi.org/10.1134/S1027451016030046>.

- [2] B.H. Toby, R.B. Von Dreele, *GSAS-II*: the genesis of a modern open-source all purpose crystallography software package, *J Appl Crystallogr.* 46 (2013) 544–549. <https://doi.org/10.1107/S0021889813003531>.
- [3] J. Berlin, Analysis of boron with energy dispersive X-ray spectrometry, *Imaging & Microscopy*. 13 (2011), 19–21. <https://www.yumpu.com/en/document/read/33185105/analysis-of-boron-with-energy-dispersive-x-ray-spectrometry-bruker>
- [4] J. Ruiz-Vargas, N. Siredey-Schwaller, P. Noyrez, S. Mathieu, P. Bocher, N. Gey, Potential and limitations of microanalysis SEM techniques to characterize borides in brazed Ni-based superalloys, *Materials Characterization*. 94 (2014) 46–57. <https://doi.org/10.1016/j.matchar.2014.04.009>.
